# Supplementary material for: It is time to stop counting calories, and time instead to promote dietary changes that substantially and rapidly reduce cardiovascular morbidity and mortality
Source: HighWire-hosted journal article supplement (doi:10.1136/openhrt-2015-000273), 2015-08-01
Supplement: openhrt-2015-000273supp_PressRelease.pdf [file openhrt-2015-000273supp_PressRelease.pdf]

## **PRESS RELEASE**

### **OPEN HEART**

#### **Shift focus from calorie counting to nutritional value of foods for heart health, say experts**

*Clinicians have failed to act for far too long, but human and economic toll make this unaffordable, they argue*

**Editorial:** It is time to stop counting calories, and time instead to promote dietary changes that substantially and rapidly reduce cardiovascular morbidity and mortality. doi 10.1136/openhrt-2015-000273

It's time to stop counting the calories, and instead start promoting the nutritional value of foods if we are to rapidly cut illness and death from cardiovascular disease and curb the rising tide of obesity, say experts in an editorial published in the online journal **Open Heart**.

Drawing on published evidence, Drs Aseem Malhotra and James DiNicolantonio and Professor Simon Capewell argue that rather like stopping smoking, simple dietary changes can rapidly improve health outcomes at the population level.

For example, boosting omega 3 fatty acid (from fatty fish), olive oil, and nut intake have all been associated with reductions in deaths from all causes and from cardiovascular disease, within months, they say.

But clinicians have failed to act for far too long, amid an excessive focus on the calorific content of food by the food and weight loss industries, despite mounting evidence that it's the nutritional content that matters, they suggest.

Daily consumption of a sugary drink (150 calories) is associated with a significantly increased risk of type 2 diabetes whereas daily consumption of a handful of nuts (30 g of walnuts, 15 g of almonds and 15 g hazelnuts) or four tablespoons of extra virgin olive oil (around 500 calories) is associated with a significantly reduced risk of heart attack and stroke.

It has been estimated that increasing nut consumption by two servings a week could stave off 90,000 deaths from cardiovascular disease in the US alone.

And the Action for Health in Diabetes trial shows that a low calorie diet on top of increased physical activity in patients with type 2 diabetes was not associated with a reduced risk of cardiovascular death despite significant weight loss and a monitoring period of 13.5 years, they point out.

"Shifting the focus away from calories and emphasising a dietary pattern that focuses on food quality rather than quantity will help to rapidly reduce obesity, related diseases, and cardiovascular risk," they insist.

"Primary and secondary care clinicians have a duty to their individual patients and also to their local populations. Our collective failure to act is an option we cannot afford," they write, citing the human and economic toll this is taking.

Obesity costs the NHS over £5 billion a year, while the costs of type 2 diabetes add up to more than £20 billion and are predicted to double over the next 20 years. Similarly, the cost of diabetes has risen 40% in the past five years in the US, adding up to \$245 billion in 2012, they say.

The evidence shows that poor diet is consistently responsible for more disease and death than physical inactivity, smoking and alcohol put together, they say, calling for sugary drinks to be taxed; government subsidies to make fruit, vegetables, and nuts more affordable; and tighter controls on the marketing of junk food.

"Applying these population wide policies might achieve rapid reductions in disease and hospital admissions visible even within the electoral terms of most politicians," they suggest.

"It is time to stop counting calories, and time to instead promote good nutrition and dietary changes that can rapidly and substantially reduce cardiovascular mortality. The evidence indeed supports the mantra that 'food can be the most powerful form of medicine or the slowest form of poison'," they write.

"Recommending a high fat Mediterranean type diet and lifestyle to our patients, friends and families, might be a good place to start," they conclude.

#### **Author contact:**

Dr Aseem Malhotra, Department of Cardiology, Frimley Park Hospital, Surrey, UK.

Tel: + 44 (0) 7786 075 842

Email: [aseem\\_malhotra@hotmail.com](mailto:aseem_malhotra@hotmail.com)

#### **About the journal:**

**Open Heart** is one of more than 50 specialist journals published by BMJ. The title is co-owned with the British Cardiovascular Society. <http://openheart.bmj.com>
